# Supplementary material for: A FTH1 gene:pseudogene:microRNA network regulates tumorigenesis in prostate cancer
Source: PubMed Central journal article supplement — Nucleic Acids Res. 2017 Dec 12;46(4):1998–2011. doi: 10.1093/nar/gkx1248 (PMC5829750; doi:10.1093/nar/gkx1248), 2017-12-12
Supplement: gkx1248_supp.pdf [file gkx1248_supp.pdf]

## Supplementary Data

### **A FTH1 gene:pseudogene:microRNA network regulates tumorigenesis in prostate cancer**

Jia Jia Chan<sup>1</sup>, Zhi Hao Kwok<sup>1</sup>, Xiao Hong Chew<sup>1</sup>, Bin Zhang<sup>1</sup>, Chao Liu<sup>2</sup>, Tuck Wah Soong<sup>2,3</sup>, Henry Yang<sup>1</sup>, Yvonne Tay<sup>1,4,\*</sup>

<sup>1</sup> Cancer Science Institute of Singapore, National University of Singapore, Singapore 117599, Singapore

<sup>2</sup> Department of Physiology, Yong Loo Lin School of Medicine, National University of Singapore, Singapore 117597, Singapore

<sup>3</sup> National Neuroscience Institute, Singapore 308443, Singapore

<sup>4</sup> Department of Biochemistry, Yong Loo Lin School of Medicine, National University of Singapore, Singapore 117597, Singapore

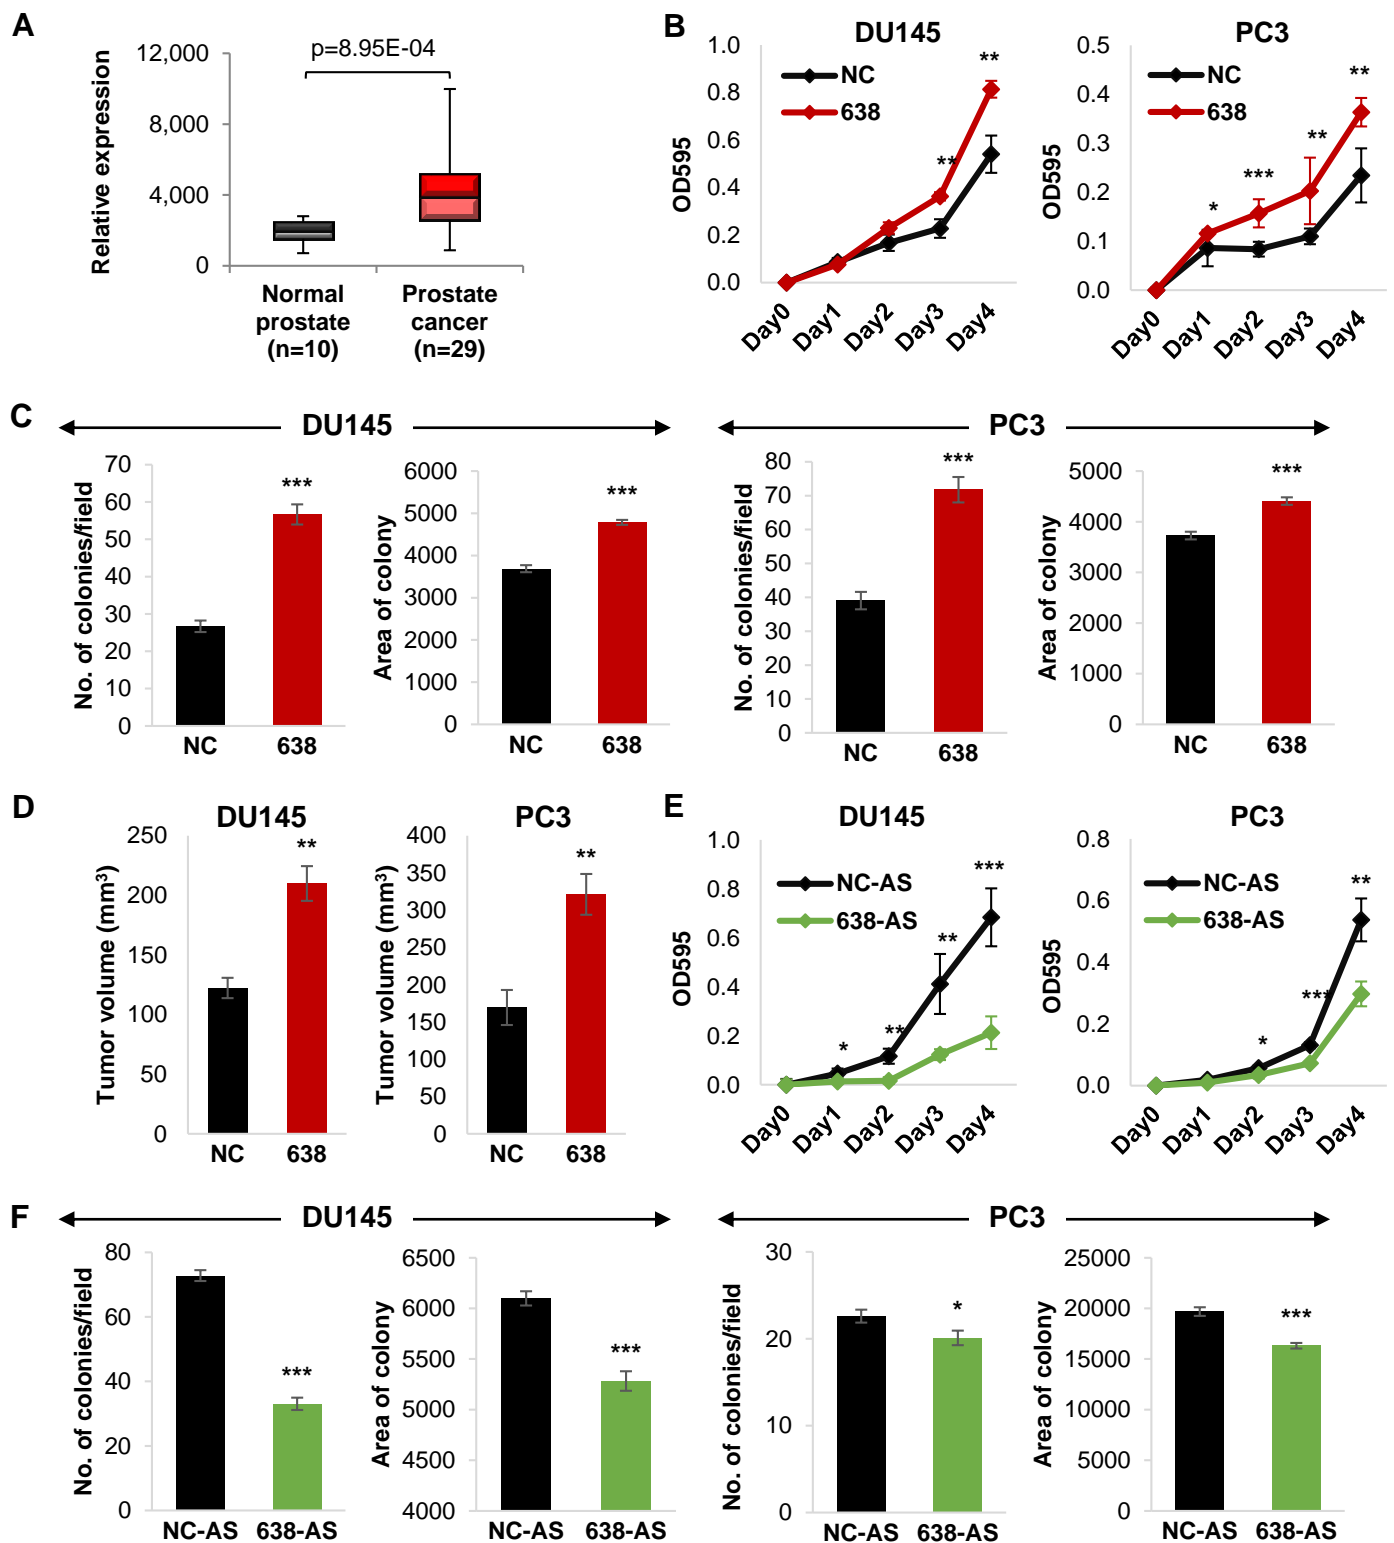

**Supplementary Figure S1. Effect of miR-638 overexpression in prostate cancer.**

(A) GEO data (GSE45604) analysis of miR-638 expression in prostate cancer compared to normal prostate.

(B-D) Effect of miR-638 overexpression on proliferation (B), anchorage-independent growth (C) and tumor xenograft growth of DU145 and PC3 cells subcutaneously injected into nude mice (D).

(E, F) Effect of miR-638 inhibition on proliferation (E) and anchorage-independent growth (F) *in vitro*.

NC and NC-AS denote non-targeting control mimic and non-targeting control antisense mimic respectively. (B, E) Mean  $\pm$  SD;  $n \geq 3$ . (C, D, F) Mean  $\pm$  SEM;  $n \geq 3$ . \* $p < 0.05$ ; \*\* $p < 0.01$ ; \*\*\* $p < 0.001$ .

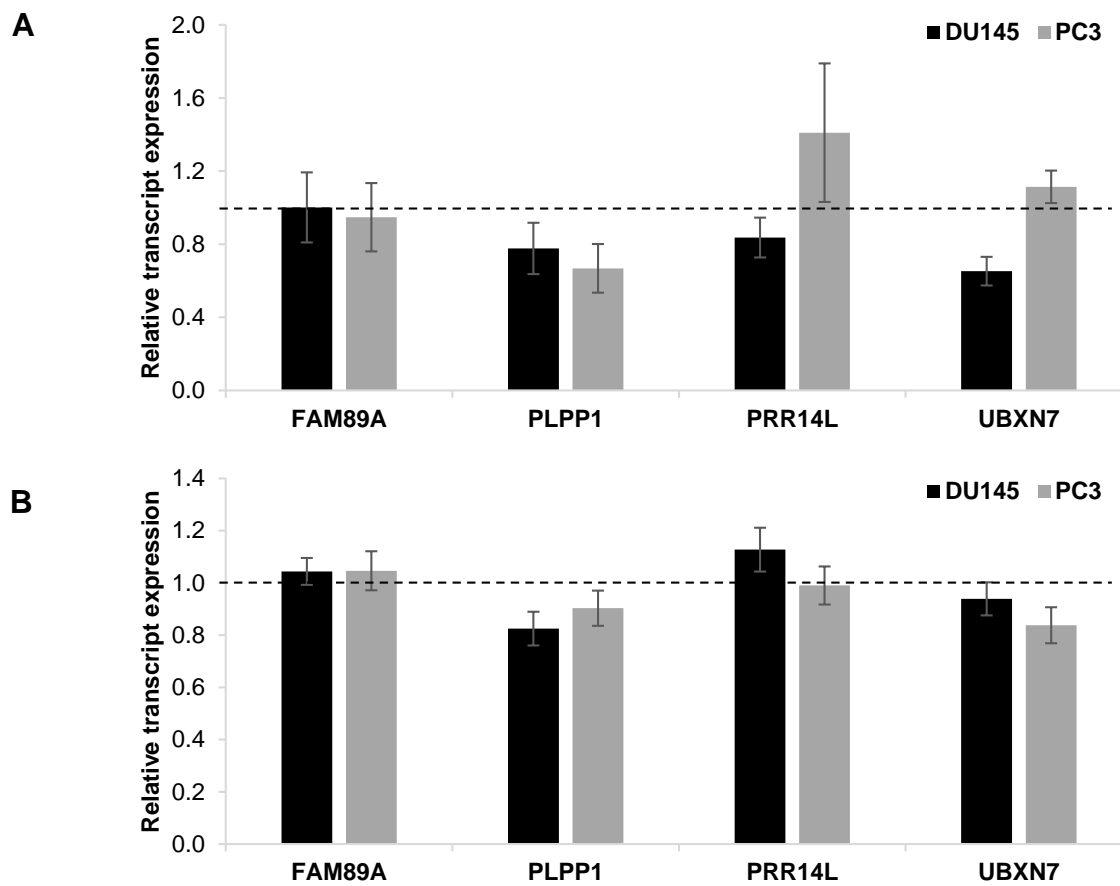

**Supplementary Figure S2. Validation of the negative controls for miR-638.**

(A, B) qRT-PCR validation of the expression of genes that are not targeted by miR-638 in biotinylated miR-638 pull-down (A) and miR-638 overexpression (B) samples.

Mean  $\pm$  SEM;  $n \geq 3$ . \* $p < 0.05$ ; \*\* $p < 0.01$ ; \*\*\* $p < 0.001$ .

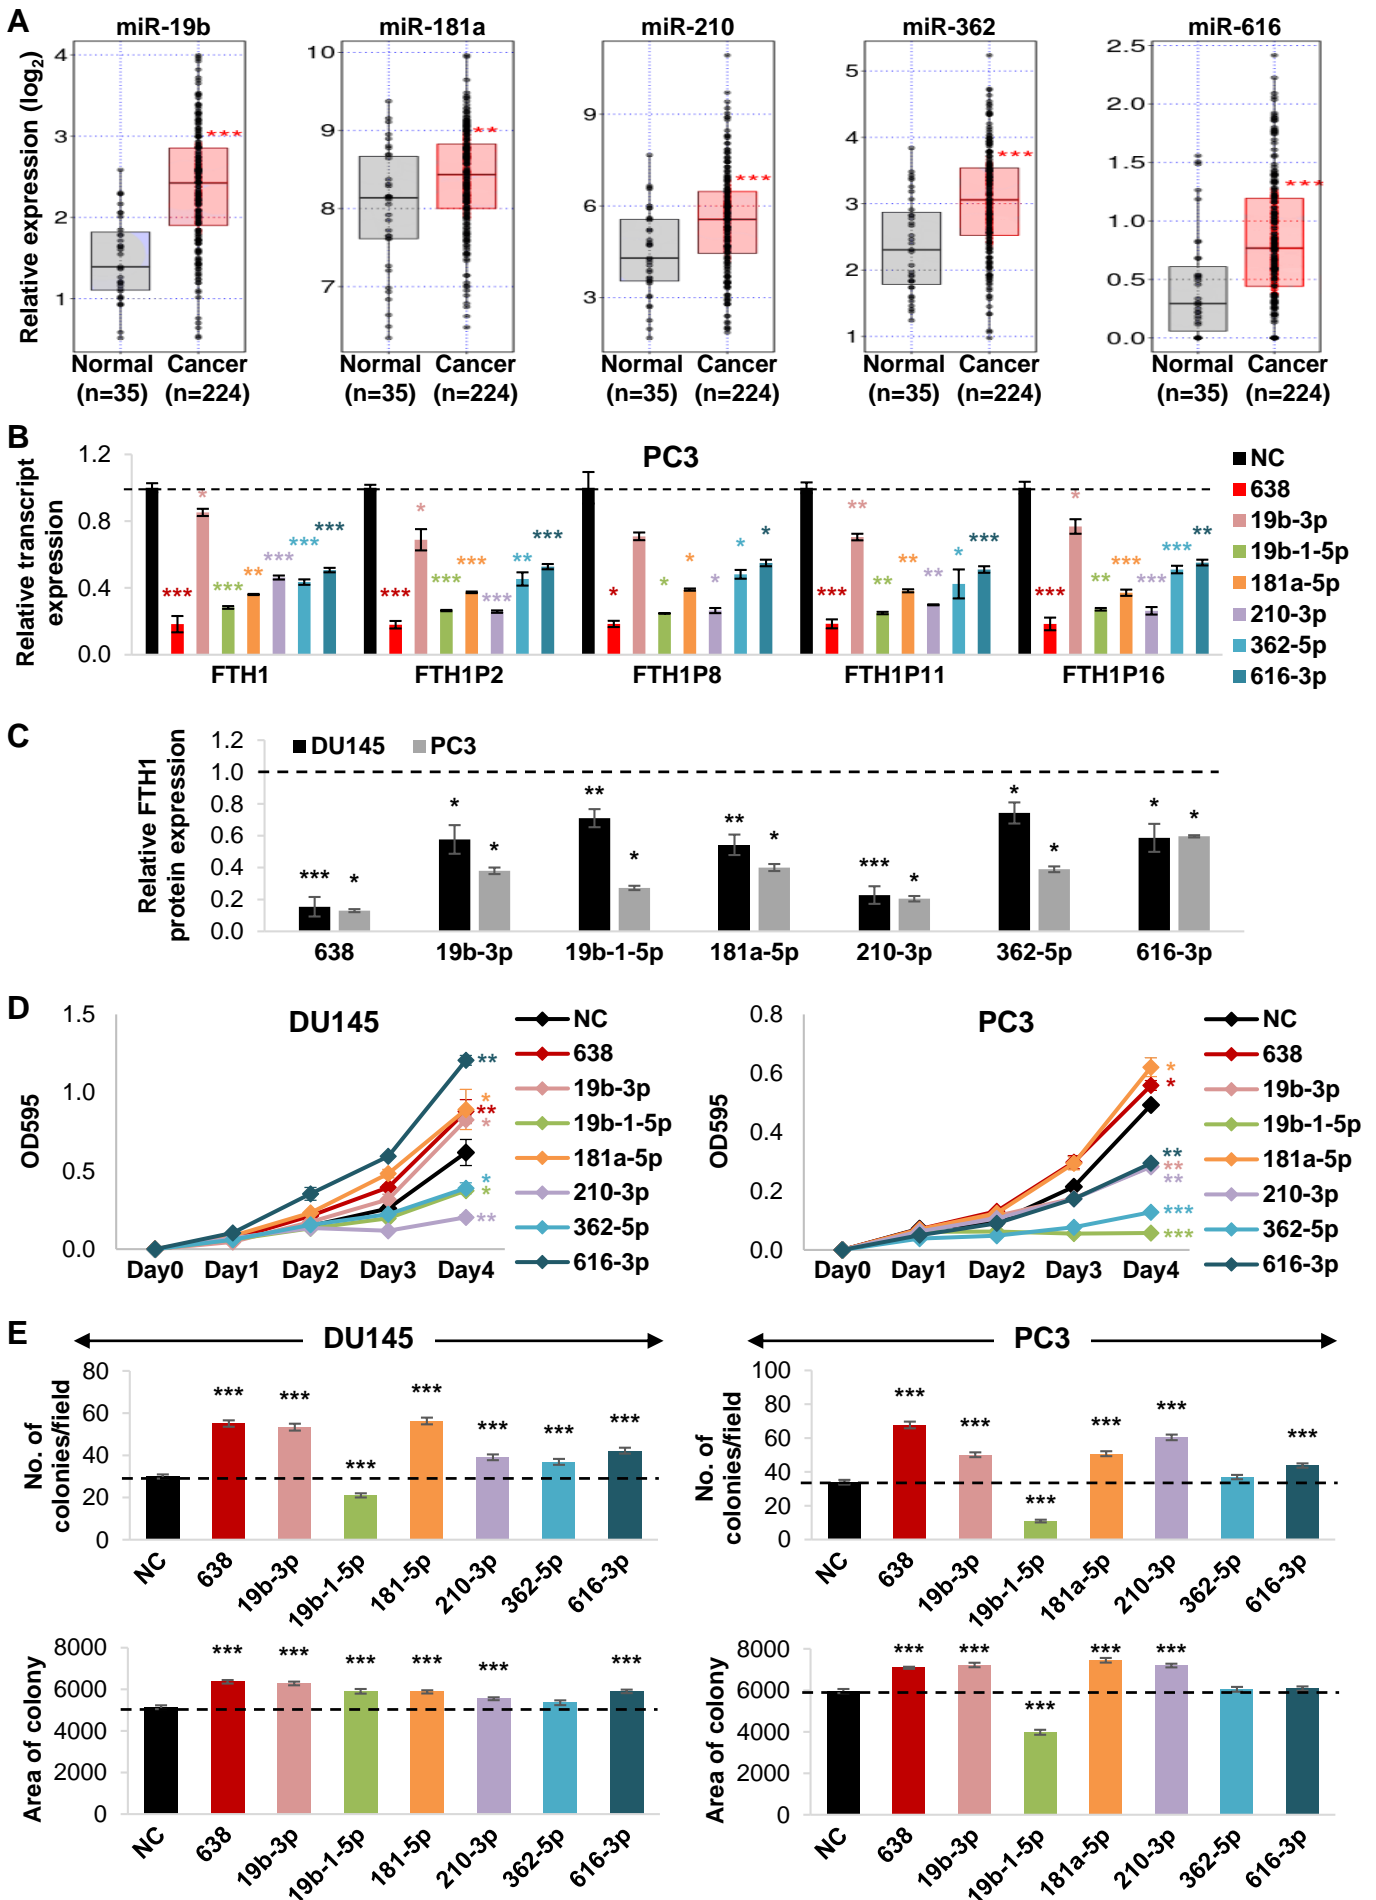

**Supplementary Figure S3. Properties of other FTH-targeting miRNAs in prostate cancer.**

(A) TCGA data analysis of the expression of selected oncogenic miRNAs in prostate cancer compared to normal prostate.

(B) Effect of selected miRNA overexpression on the transcript expression of FTH1 and its pseudogenes in PC3 cells.

(C) Quantification of the effect of selected miRNA overexpression on FTH1 protein expression.

(D) Effect of selected miRNA overexpression on proliferation *in vitro*.

(E) Quantification of selected miRNA overexpression on anchorage-independent growth *in vitro*.

(B, C, E) Mean  $\pm$  SEM;  $n \geq 3$ . (D) Mean  $\pm$  SD;  $n \geq 3$ . \* $p < 0.05$ ; \*\* $p < 0.01$ ; \*\*\* $p < 0.001$ .

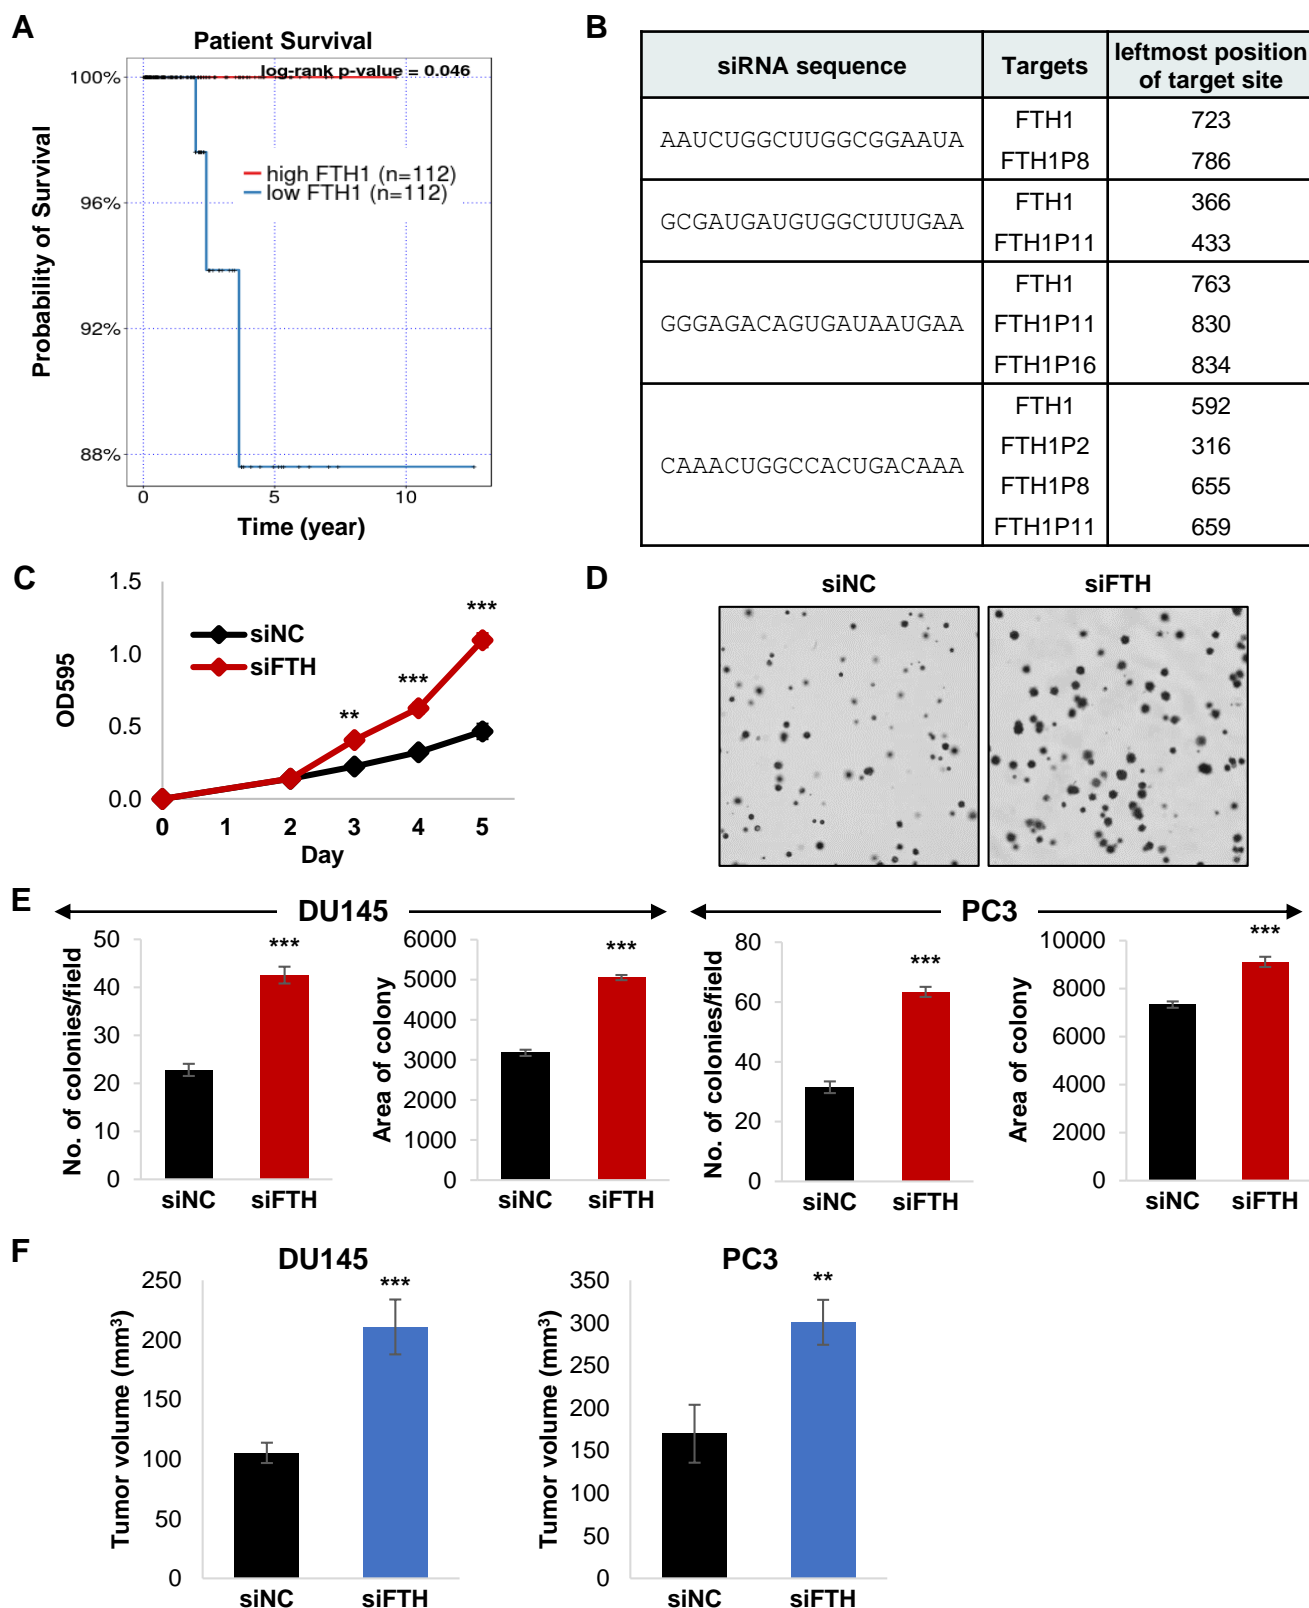

**Supplementary Figure S4. Effects of silencing FTH1 and its pseudogenes in prostate cancer.**

(A) TCGA-derived Kaplan-Meier survival curve of prostate cancer patients with differential FTH1 expression.

(B) siRNA sequences in the FTH1 siRNA pool and the position of the sites targeted on the respective transcripts.

(C, D) Effect of siRNA-mediated knockdown of FTH1 and its pseudogenes on proliferation (C) and anchorage-independent growth (D) in PC3 cells.

(E) Quantification of the effect of siRNA-mediated knockdown of FTH1 and its pseudogenes on anchorage-independent growth *in vitro*.

(F) Effect of siRNA-mediated knockdown of FTH1 and its pseudogenes on tumor xenograft growth of DU145 and PC3 cells subcutaneously injected into nude mice.

(C) Mean  $\pm$  SD;  $n \geq 3$ . (E, F) Mean  $\pm$  SEM;  $n \geq 3$ . \* $p < 0.05$ ; \*\* $p < 0.01$ ; \*\*\* $p < 0.001$ .

**A**

| Target  | ASO name | ASO sequence          | Number of nucleotide mismatches between ASO and gene |        |        |         |         |
|---------|----------|-----------------------|------------------------------------------------------|--------|--------|---------|---------|
|         |          |                       | FTH1                                                 | FTH1P2 | FTH1P8 | FTH1P11 | FTH1P16 |
| FTH1P2  | ASO2.1   | CATCCACTTAAGTTCGTTGA  | >7                                                   |        | >6     | 9       | >6      |
|         | ASO2.2   | TTGTACCAAAAACATCCACTT | 8                                                    |        | 8      | >7      | 8       |
| FTH1P11 | ASO11.1  | AGACCGTCTCCGCCTTCTCT  | 8                                                    | >7     | 8      |         | >7      |
|         | ASO11.2  | TTTAAAACCCCAGACTTTTC  | >7                                                   | >4     | 9      |         | >7      |
| FTH1P16 | ASO16.1  | CTCGGCAAAGAACGTCTCTA  | 4                                                    | 8      | 2      | 4       |         |
|         | ASO16.2  | AGTTGCTACGTAACAGTACA  | >7                                                   | 7      | >5     | 9       |         |

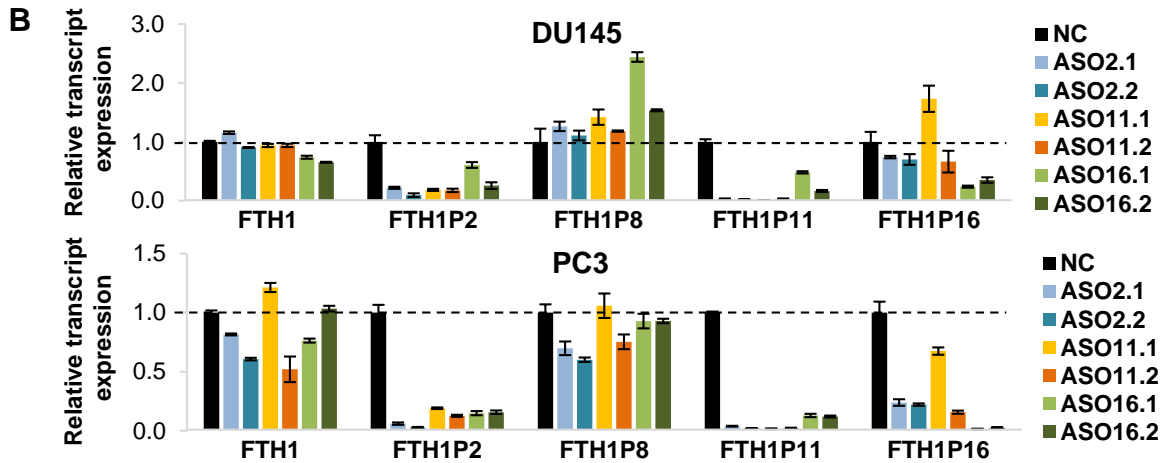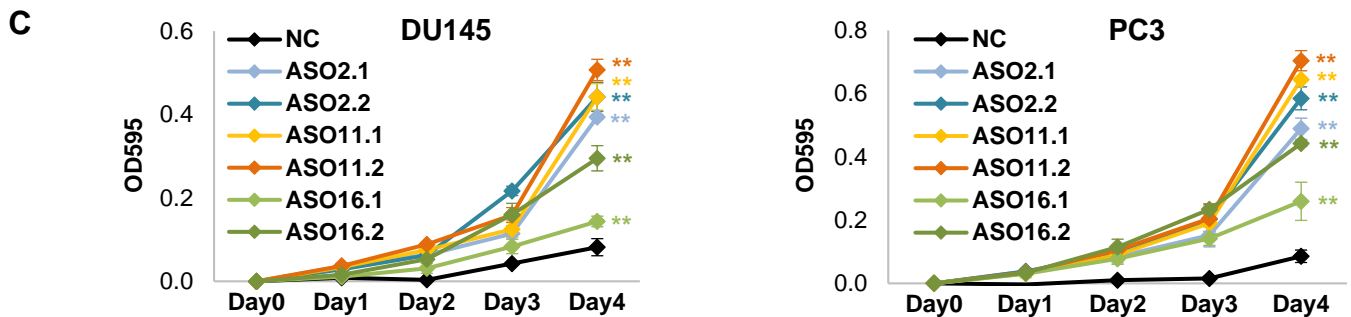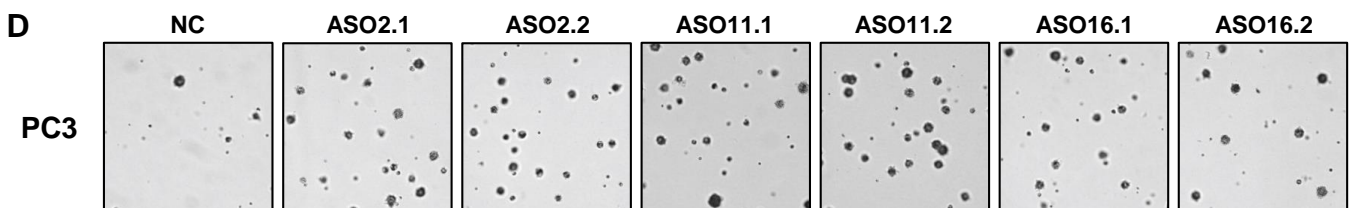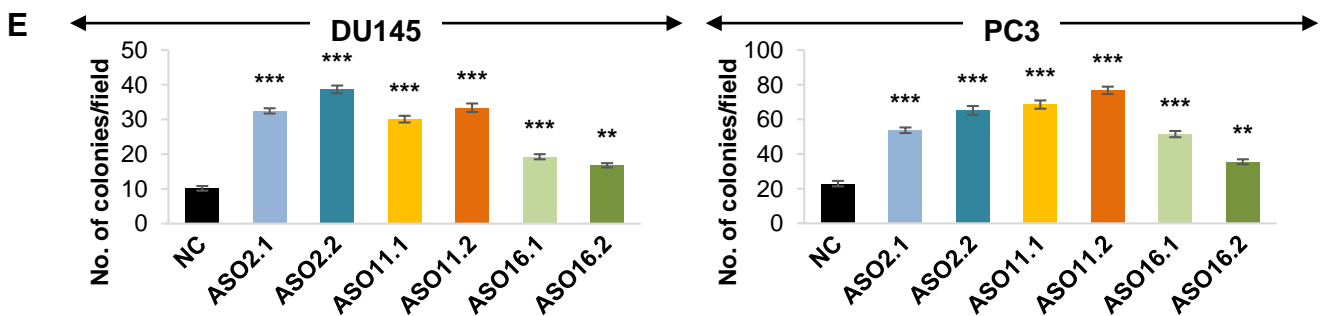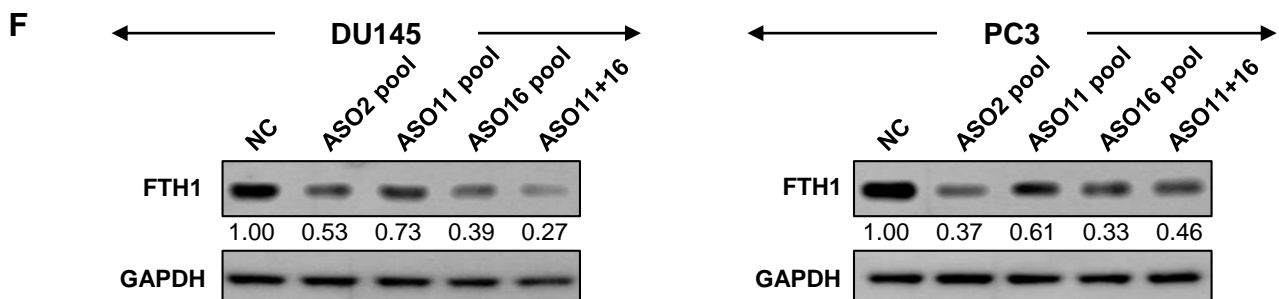

**Supplementary Figure S5. Effects of ASO-mediated knockdown of FTH1 pseudogenes in prostate cancer.**

(A) Antisense oligonucleotide (ASO) sequences targeting the FTH1 pseudogenes. The number of nucleotide mismatches is derived from sequence alignments of each ASO and transcript. Alignments with breaks in the middle of individual ASO sequences are indicated with ">".

(B) qRT-PCR validation of ASO-mediated FTH1 pseudogene knockdown.

(C) Effect of ASO-mediated knockdown of the FTH1 pseudogenes on cell proliferation.

(D, E) Effect of (D) and quantification of the effect of (E) ASO-mediated knockdown of the FTH1 pseudogenes on anchorage-independent growth *in vitro*.

(F) Effect of ASO-mediated knockdown of the FTH1 pseudogenes on FTH1 protein expression. Pool denotes the combination of two ASOs designed to target the same pseudogene.

(B, E) Mean  $\pm$  SEM; n  $\geq$  3. (C) Mean  $\pm$  SD; n  $\geq$  3. \*p < 0.05; \*\*p < 0.01; \*\*\*p < 0.001.



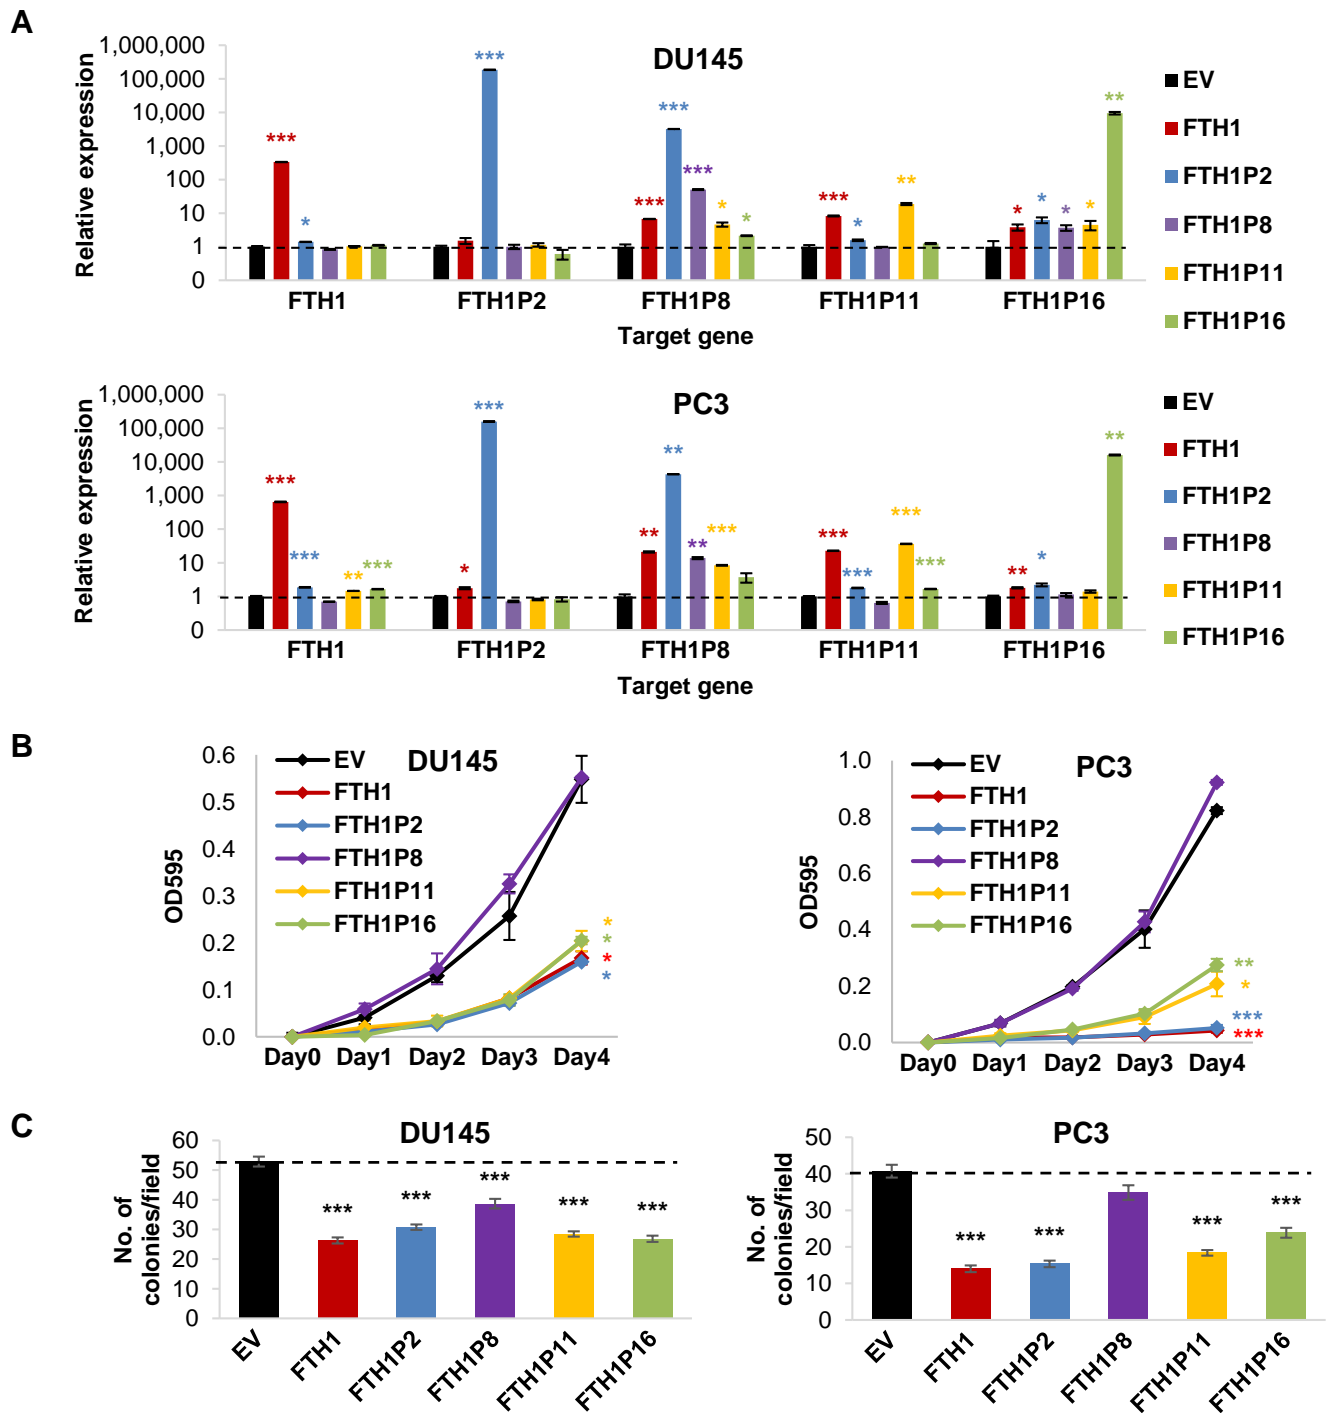

**Supplementary Figure S6. Quantification of the effects of overexpressing FTH1 and its pseudogenes.**

(A) qRT-PCR validation of the overexpression of FTH1 and its pseudogenes.

(B) Effect of overexpressing FTH1 and its pseudogenes on proliferation *in vitro*.

(C) Quantification of the effect of overexpressing FTH1 and its pseudogenes on anchorage-independent growth *in vitro*.

(A, C) Mean  $\pm$  SEM;  $n \geq 3$ . (B) Mean  $\pm$  SD;  $n \geq 3$ . \* $p < 0.05$ ; \*\* $p < 0.01$ ; \*\*\* $p < 0.001$ .

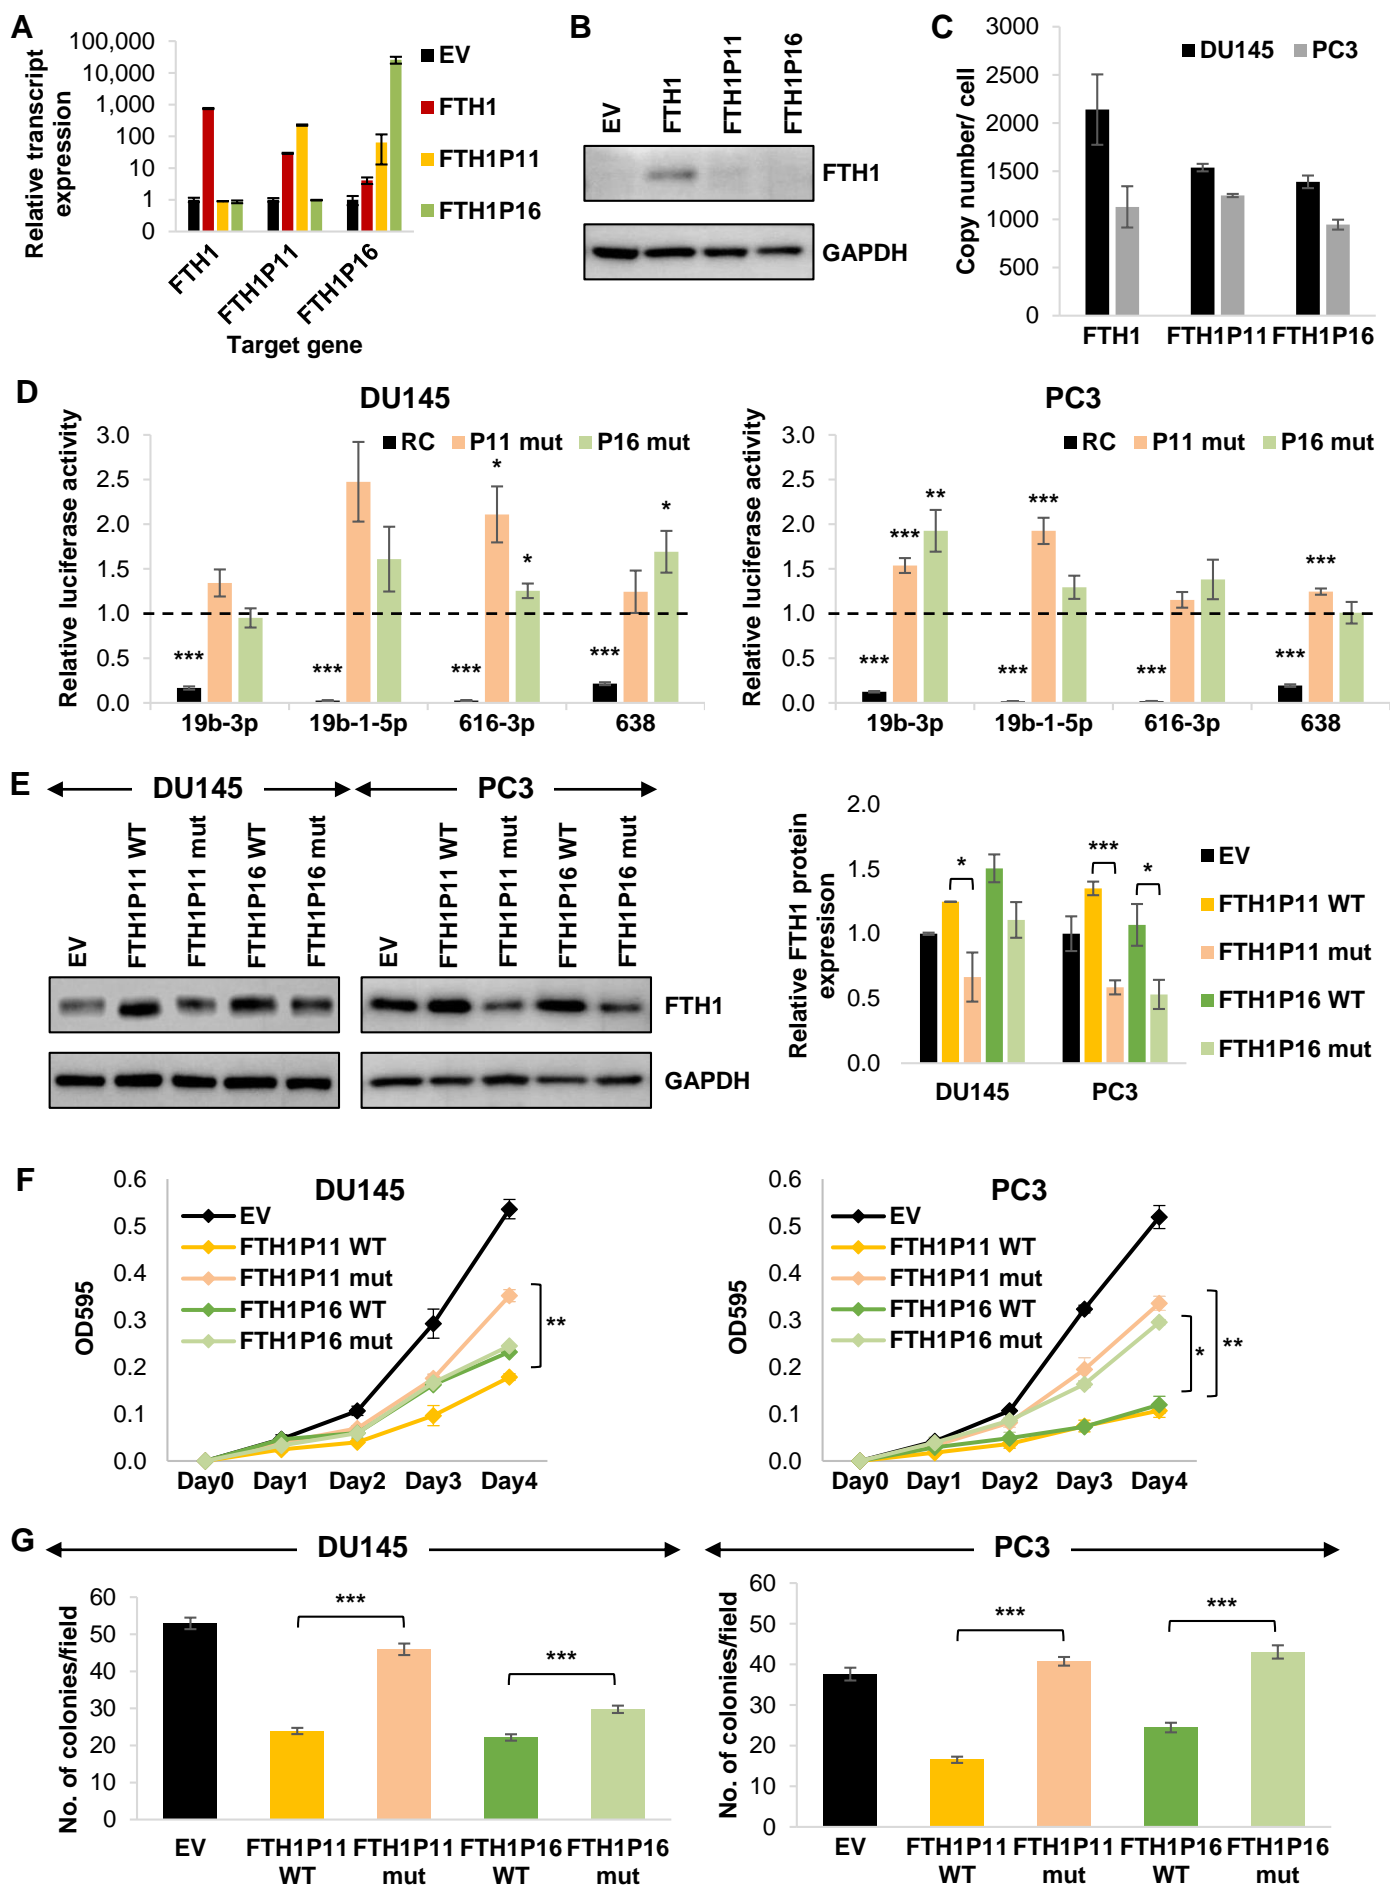

**Supplementary Figure S7. Effect of MRE mutations on FTH1 pseudogenes.**

(A) qRT-PCR validation of the overexpression of FTH1, FTH1P11 and FTH1P16 in Hap1 FTH1 knockout cell line.

(B) Effect of the overexpression of FTH1, FTH1P11 and FTH1P16 on FTH1 protein expression in Hap1 FTH1 knockout cell line.

(C) Estimated copy number per cell of FTH1 and its pseudogenes in DU145 and PC3 cells.

(D) Effect of selected miRNA overexpression on the luciferase reporter activity of the reverse complement (RC) control, and FTH1P11 and FTH1P16 MRE mutants (denoted by P11 and P16 mut).

(E-G) Effect of overexpressing wild-type (WT) and mutant FTH1P11 and FTH1P16 (mut) on FTH1 protein expression (E), cell proliferation (F) and anchorage-independent growth (G) *in vitro*.

(A, C, D, E, G) Mean  $\pm$  SEM;  $n \geq 3$ . (F) Mean  $\pm$  SD;  $n \geq 3$ . \* $p < 0.05$ ; \*\* $p < 0.01$ ; \*\*\* $p < 0.001$ .

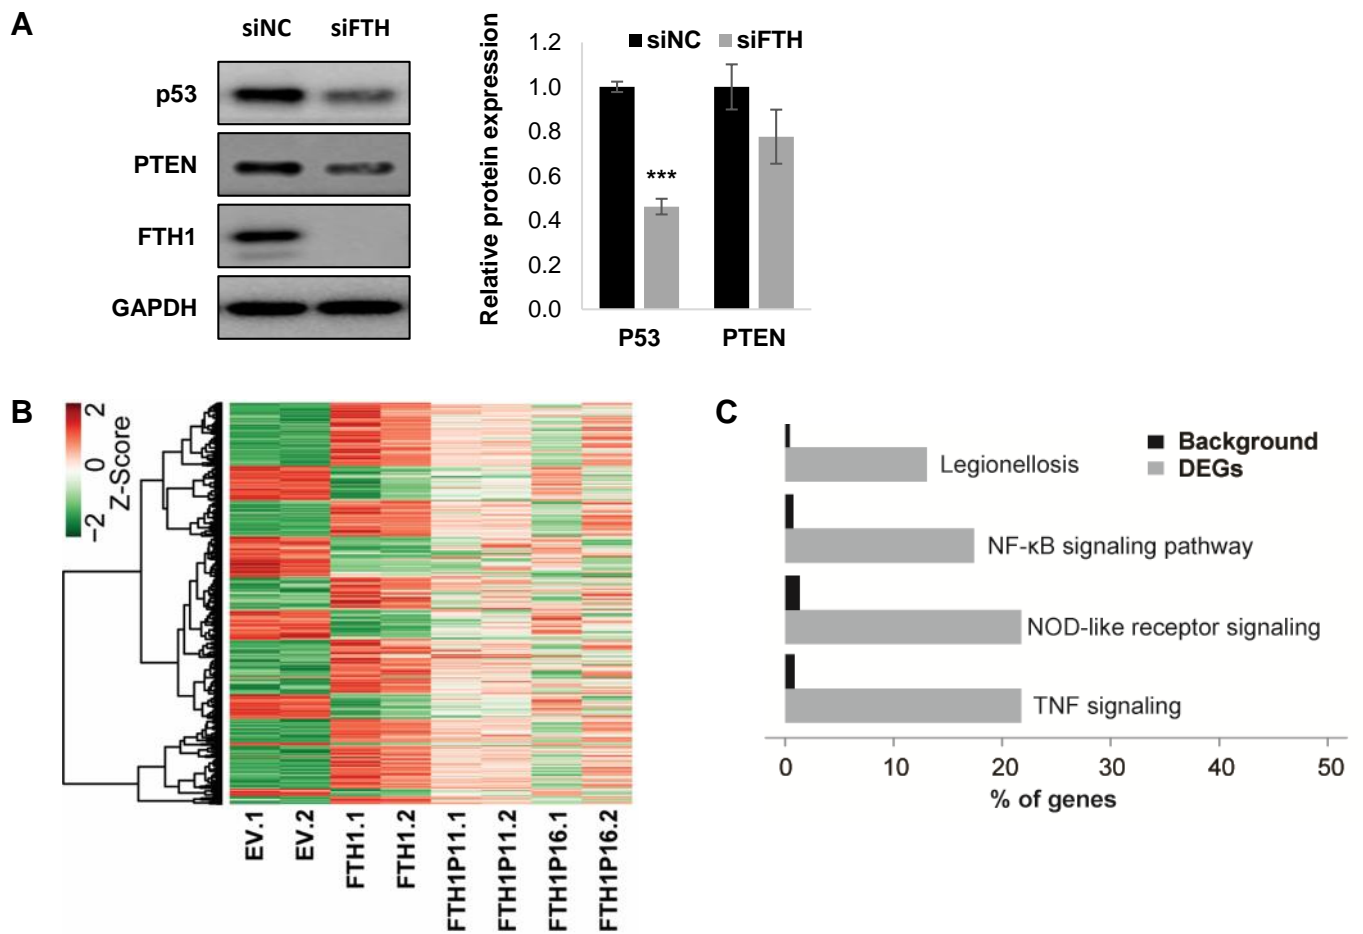

**Supplementary Figure S8. Other regulatory pathways involving the FTH1 gene:pseudogene network.**

(A) Effect of siRNA-mediated knockdown of FTH1 and its pseudogenes on protein expression of p53 and PTEN. Mean  $\pm$  SEM;  $n \geq 3$ . \* $p < 0.05$ ; \*\* $p < 0.01$ ; \*\*\* $p < 0.001$ .

(B, C) Microarray analysis of differentially expressed genes (DEGs) (B) and KEGG pathway analysis of DEGs (C) upon FTH1, FTH1P11 and FTH1P16 overexpression.

**Supplementary Table S1. Predicted miR-638 MREs on FTH1 and its pseudogenes.**

| Transcript | MRE no. | leftmost position of predicted target site | folding energy (-Kcal/mol) | MRE/ miRNA heteroduplex                                                                    | p-value  |
|------------|---------|--------------------------------------------|----------------------------|--------------------------------------------------------------------------------------------|----------|
| FTH1       | 1       | 390                                        | -11.1                      | TTGCCAAATACTTTCTTCACCAATCTCA<br>    :  :  ::     : <br>TCCGG-CGGTGGGCGGG--CGCTAGGGA        | 9.15E-02 |
|            | 2       | 491                                        | -14.9                      | ATCAAGAAACCAGACTGTGATGACT<br>       : :      <br>TCCGGCGGTGGGCGGGCGCTAGGGA                 | 1.96E-02 |
|            | 3       | 594                                        | -14.7                      | AACTGGCCACTGACAAAAATGACCCCC<br>:     :   :      <br>TCCGGCGGTGGGCG--GGCGCTAGGGA            | 3.12E-02 |
|            | 4       | 937                                        | -14.1                      | AATTTGGTACCCAGGTGTTGTCTTT<br>::  :    : : :  : <br>TCCGGCGGTGGGCGGGCGCTAGGGA               | 1.21E-01 |
|            | 5       | 989                                        | -16.9                      | TCCAGGCTATCTTCC--AGATTCCCT<br> : : :       :     <br>TCCGGCGGTGGGCGGGCGCTAGGGA             | 1.15E-02 |
| FTH1P2     | 6       | 16                                         | -10.3                      | AGGAATGGTACAAATCAACGAACTTA<br>    :  :   :       ::<br>TCC-GGCGGTGGGCGGGCGCTAGGGA          | 3.79E-01 |
|            | 1       | 114                                        | -11.1                      | TTGCCAAATACTTTCTTCACCAATCTCA<br>    :  :  ::     : <br>TCCGG-CGGTGGGCGGG--CGCTAGGGA        | 9.06E-02 |
|            | 2       | 215                                        | -14.9                      | ATCAAGAAACCAGACTGTGATGACT<br>       : :      <br>TCCGGCGGTGGGCGGGCGCTAGGGA                 | 1.90E-02 |
|            | 3       | 318                                        | -14.7                      | AACTGGCCACTGACAAAAATGACCCCC<br>:     :   :      <br>TCCGGCGGTGGGCG--GGCGCTAGGGA            | 3.02E-02 |
|            | 7       | 550                                        | -19.8                      | CCCTGGTCACC-AAGAGTTATCCCT<br>:  :     :      <br>TCCGGCGGTGGGCGGGCGCTAGGGA                 | 3.60E-01 |
| FTH1P8     | 1       | 455                                        | -11.1                      | TTGCCAAATACTTTCTTCACCAATCTCA<br>    :  :  ::     : <br>TCCGG-CGGTGGGCGGG--CGCTAGGGA        | 9.15E-02 |
|            | 2       | 556                                        | -14.9                      | ATCAAGAAACCAGACTGTGATGACT<br>       : :~      <br>TCCGGCGGTGGGCGGGCGCTAGGGA                | 2.03E-02 |
|            | 3       | 657                                        | -14.7                      | AACTGGCCACTGACAAAAATGACCCCC<br>:     :   :      <br>TCCGGCGGTGGGCG--GGCGCTAGGGA            | 2.03E-02 |
|            | 8       | 901                                        | -19.2                      | AGGCAGTGCATGCATGTTGGGGTTTCTT<br>         :  : :~      :   <br>TCCG--GCG-GTGGGCGGGCGCTAGGGA | 2.73E-01 |

|         |    |     |       |                                                                                              |          |
|---------|----|-----|-------|----------------------------------------------------------------------------------------------|----------|
| FTH1P11 | 2  | 558 | -14.9 | ATCAAGAAACCAGACTGTGATGACT<br>       : :     <br>TCCGGCGGTGGGCGGGCGCTAGGGA                    | 1.96E-02 |
|         | 3  | 661 | -14.7 | AAC TGGCCACTGACAAAAATGACCCCC<br>:     :   :       <br>TCCGGCGGTGGGCG--GGCGCTAGGGA            | 1.34E-02 |
| FTH1P16 | 9  | 11  | -10.3 | ATACCATGACATC--ACCACAGTCTTA<br>        :      : : <br>TCCGG--CGGTGGGCGGGCGCTAGGGA            | 1.82E-02 |
|         | 10 | 183 | -22.8 | CGGCCGCC-CATAGCCAGCCCTCCCT<br>                           <br>TCCGGCGGTG-GGCGGGCGCTAGGGA      | 1.83E-01 |
|         | 11 | 270 | -26.7 | CCACTGCCACCGCCGCCACCTCTCCTT<br> :                           <br>TCCGGCGGTGG--GCGGGCGCTAGGGA  | 6.34E-02 |
|         | 1  | 461 | -11.1 | TTGCCAAATACTTTCTTCACCAATCTCA<br>      : :   :               <br>TCCGG-CGGTGGGCGGG--CGCTAGGGA | 9.15E-02 |
|         | 2  | 562 | -14.1 | ATCAAAAAACCAGACTGTGATGACT<br>       : :               <br>TCCGGCGGTGGGCGGGCGCTAGGGA          | 2.80E-02 |
|         | 12 | 665 | -14.7 | AAT TGGCCACTGACAAAAATGACCCCC<br>:     :   :       <br>TCCGGCGGTGGGCG--GGCGCTAGGGA            | 4.16E-02 |

**Supplementary Table S2. Predicted MREs of miRNAs that target FTH1 and its pseudogenes.**

| miRNA Name       | Transcript | leftmost position of predicted target site | folding energy (-Kcal/mol) | MRE/ miRNA heteroduplex                                                                                         | p-value  |
|------------------|------------|--------------------------------------------|----------------------------|-----------------------------------------------------------------------------------------------------------------|----------|
| hsa-miR-19b-3p   | FTH1P2     | 295                                        | -16.7                      | TCAGTCACTACTGGAAGTGCACA<br>                                    <br>AGTCAAAACGTACCTAAACGTGT                      | 3.02E-02 |
|                  | FTH1P8     | 634                                        | -16.8                      | TCAGT-CACCACTGGAAGTGCACA<br>                                    <br>AGTCAAAACGT-ACCTAAACGTGT                    | 2.03E-02 |
|                  | FTH1P16    | 642                                        | -16.7                      | TCAGTCACTACTGGAAGTGCACA<br>                                    <br>AGTCAAAACGTACCTAAACGTGT                      | 4.16E-02 |
| hsa-miR-19b-1-5p | FTH1P2     | 165                                        | -15                        | AAGTATG-AAGC-TGCAGAACC<br>              :           :          <br>CGACCTACGTTTGGACGTTTGA                       | 2.94E-02 |
|                  | FTH1P11    | 508                                        | -15                        | AAGTATG-AAGC-TGCAGAACC<br>              :           :          <br>CGACCTACGTTTGGACGTTTGA                       | 3.03E-02 |
|                  | FTH1P16    | 513                                        | -15.4                      | ACTG-ATG-AAGC-TGCAGAACC<br>              :           :          <br>CGACCTACGTTTGGACGTTTGA                      | 3.03E-02 |
| hsa-miR-181a-5p  | FTH1P8     | 893                                        | -19                        | GGTCACCAAGGCAGTGCATGCATGTT<br>:                :       :                         <br>TGAGTGG--CTGTCGC-AACTTACAA | 2.73E-01 |
|                  | FTH1P16    | 899                                        | -19                        | GGTCACCAAGGCAGTGCATGCATGTT<br>:                :       :                         <br>TGAGTGG--CTGTCGC-AACTTACAA | 1.74E-01 |
| hsa-miR-210-3p   | FTH1P2     | 299                                        | -16.2                      | TCA-CTACTGGAAC-TGCACAA<br>                      :                    <br>AGTCGGCGACAGTGTGCGTGTGTC               | 3.02E-02 |
|                  | FTH1P8     | 638                                        | -18.3                      | TCA-CCACTGGAAC-TGCACAA<br>                      :                    <br>AGTCGGCGACAGTGTGCGTGTGTC               | 2.03E-02 |

|                |         |     |       |                                                                                       |          |
|----------------|---------|-----|-------|---------------------------------------------------------------------------------------|----------|
| hsa-miR-362-5p | FTH1P2  | 478 | -17.9 | GCACAC-CCTGGGGGACAGTGATA<br>:         :      :      <br>TGAGTGTGGATCCAAGGTTCTAA       | 1.76E-01 |
|                | FTH1P11 | 821 | -16.8 | GCACAC-CCTGGGAGACAGTGATA<br>:         :      :      <br>TGAGTGTGGATCCAAGGTTCTAA       | 1.46E-01 |
|                | FTH1P16 | 825 | -16.8 | GCACAC-CCTGGGAGACAGTGATA<br>:         :      :      <br>TGAGTGTGGATCCAAGGTTCTAA       | 1.74E-01 |
| hsa-miR-616-3p | FTH1P2  | 176 | -16   | CTGC-AGAACCAACGAGGTGGCC<br>        :       : :     :  <br>GACGAGTTTG-GAGGTTACTGA      | 2.94E-02 |
|                | FTH1P2  | 311 | -21.6 | CTGCACAAACTGGCCACTGACA<br>                :              <br>GACGAGTTTGGGAGGTTACTGA   | 3.02E-02 |
|                | FTH1P8  | 517 | -16   | CTGC-AGAACCAATGAGGTGGCC<br>        :       : :     :  <br>GACGAGTTTG-GAGGTTACTGA      | 1.29E-02 |
|                | FTH1P8  | 650 | -21.6 | CTGCACAAACTGGCCACTGACA<br>                :              <br>GACGAGTTTGGGAGGTTACTGA   | 2.03E-02 |
|                | FTH1P11 | 519 | -16   | CTGC-AGAACCAACGAGGTGGCC<br>        :       : :     :  <br>GACGAGTTTG-GAGGTTACTGA      | 3.03E-02 |
|                | FTH1P11 | 654 | -20   | CTGTACAAACTGGCCACTGACA<br>      :         :              <br>GACGAGTTTGGGAGGTTACTGA   | 1.34E-02 |
|                | FTH1P16 | 523 | -16   | CTGC-AGAACCAACGAGGTGGCC<br>        :       : :     :  <br>GACGAGTTTG-GAGGTTACTGA      | 3.03E-02 |
|                | FTH1P16 | 658 | -19.2 | CTGCACAAATTGGCCACTGACA<br>                : :              <br>GACGAGTTTGGGAGGTTACTGA | 4.16E-02 |



**Supplementary Table S3. Mutated MREs and primer sequences used for mutagenesis.**

| Gene    | miRNA Name       | Mutated MRE sequence                           | Mutagenesis primer sequence                                                             |
|---------|------------------|------------------------------------------------|-----------------------------------------------------------------------------------------|
| FTH1P11 | hsa-miR-19b-1-5p | AACTGATGAAGCTG <b>GTCTTGC</b>                  | TCGGCCACCTCGTTG <b>CAAGACC</b> CAGCTT<br>CATCAGTTTC                                     |
|         | hsa-miR-616-3p   | CTG <b>GTCTTGC</b> CAACGACC <b>ACCGC</b> *     | CTGAAGGAAGATT <b>CGCGGTGG</b> TCGTTG<br><b>CAAGACC</b> CAGCT                            |
|         |                  | CTGTACAAACTGGCC <b>TC</b> ACTGA                | TGGGGGT <b>C</b> ATTTTT <b>TCAGT</b> AGGCCAGT<br>TTGTACAG                               |
|         | hsa-miR-638      | AACTGGCC <b>TC</b> ACTGAAAAAT <b>CTCGGGC</b> * | GAAGTCACACAAAT <b>CGCCGAG</b> ATTTTT<br><b>CAGT</b> AGGCCA**                            |
| FTH1P16 | hsa-miR-19b-3p   | TCAGTCACTACTGGAAC <b>ACGTGA</b>                | GAAGTCACACAAAT <b>CGCCGAG</b> ATTTTT<br>GTCAGTGGCCAATTT <b>CACGT</b> GTTCCAG<br>TAGTG** |
|         | hsa-miR-19b-1-5p | ACTGATGAAGCTG <b>GTCTTGC</b>                   | GATTCGGCCACCTCGTTG <b>CAAGACC</b> CAG<br>CTTCATCAGTTTCTCAGC                             |
|         | hsa-miR-616-3p   | CTG <b>GTCTTGC</b> CAACGACC <b>ACCGC</b> *     | CTGAAGGAAGATT <b>CGCGGTGG</b> TCGTTG<br><b>CAAGACC</b> CAGC**                           |
|         | hsa-miR-638      | ATACCATGACATCACCACA <b>CAGAAA</b>              | GCTACGTAACAGTACAAGTTTT <b>TTCTG</b><br>TGTGGTGATGTCATGG                                 |
|         |                  | CCACTGCCACCGCCGCCACCT <b>AGGAT</b>             | CATGGCGGCGACTA <b>TCCT</b> GAGGTGGCG<br>GCG                                             |
|         |                  | TTGCCAAATACTTTCTT <b>CACCA</b> TAGAGA          | GCTCCCTCTCCTCAT <b>CTCTA</b> TGGTGAA<br>GAAAGTATTTGGC                                   |
|         |                  | AATTGGCCACTGACAAAAAT <b>CTCGGGC</b>            | GAAGTCACACAAAT <b>CGCCGAG</b> ATTTTT<br>GTCAGTGGC                                       |

Mutated nucleotides are in red

\* MRE contains overlapping mutated sequence from another closely spaced MRE

\*\* Primers used in sequential mutagenesis to mutate closely spaced MREs
